# Supplementary material
Source: PubMed Central journal article supplement (PMC7103943)
Supplement: mmc1.pdf [file mmc1.pdf]

# THE LANCET

## Gastroenterology & Hepatology

### Supplementary appendix

Supplement to: Mao R, Liang J, Shen J, et al. Implications of COVID-19 for patients with pre-existing digestive diseases. *Lancet Gastroenterol Hepatol* 2020; published online March 11. [https://doi.org/10.1016/S2468-1253\(20\)30076-5](https://doi.org/10.1016/S2468-1253(20)30076-5).

This translation in Chinese was submitted by the authors and we reproduce it as supplied. It has not been peer reviewed. *The Lancet Gastroenterology and Hepatology's* editorial processes have only been applied to the original in English, which should serve as reference for this manuscript.

此简体中文译文由作者提交，我方按照提供的版本刊登。此译文并未经过同行审阅。医学期刊《柳叶刀》的编辑流程仅适用于英文原稿，英文原稿应作为此手稿的参考。

# COVID-19对消化系统疾病诊治的影响

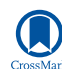

Lancet Gastroenterol Hepatol  
2020

Published Online  
March 11, 2020  
[https://doi.org/10.1016/S2468-1253\(20\)30076-5](https://doi.org/10.1016/S2468-1253(20)30076-5)

For WHO Coronavirus Disease  
2019 (COVID-19) Situation  
Report 48 see [https://www.who.int/docs/default-source/coronaviruse/situation-reports/20200308-sitrep-48-covid-19.pdf?sfvrsn=16f7ccef\\_4](https://www.who.int/docs/default-source/coronaviruse/situation-reports/20200308-sitrep-48-covid-19.pdf?sfvrsn=16f7ccef_4)

2019年12月以来由严重急性呼吸道综合征冠状病毒2 (SARS-CoV-2) 引起的新型冠状病毒肺炎 (COVID-19) 迅速爆发, 波及全世界。截至2020年3月8日, 超过100个国家报告了超过10.5万例实验室确诊病例和3500例死亡病例。

因为美国在第一例报道的新型冠状病毒肺炎患者粪便标本中, SARS-CoV-2 RNA被首次检出以来,<sup>1</sup> SARS-CoV-2胃肠道感染的研究和报道已引起广泛关注。2020年1月29日一项来自中国552家医院的研究<sup>2</sup>显示, 1099名经实验室确诊的新型冠状病毒肺炎患者中, 55例 (5.6%) 和42例 (3.8%) 患者出现恶心和/或呕吐和腹泻[2]。尸检对理解新型冠状病毒肺炎累及消化系统至关重要。然而到目前为止, 只有一例85岁男性新型冠状病毒肺炎尸检报告<sup>3</sup>显示小肠节段性扩张和狭窄, 这是继发于新型冠状病毒肺炎还是之前已存在的胃肠道疾病尚不清楚。

COVID-19对既往消化系统疾病患者的治疗具有影响。新型冠状病毒肺炎患者的合并症及合并症数量与预后较差相关。1099例实验室确诊COVID-19患者研究<sup>2</sup>显示, 261例 (23.7%) 新型冠状病毒肺炎患者至少合并一种合并症, 其中高血压、糖尿病或冠心病最常见。在这项研究中,<sup>2</sup> 23例患者 (2.1%) 有乙型肝炎病毒感染。重症患者乙肝感染阳性率高于非重症患者 (2.4% vs 0.6%)。肝功能检测异常包括天冬氨酸氨基转移酶增高 (168例[22%]/757例)、丙氨酸氨基转移酶增高 (158例[21%]/741例) 和总胆红素升高 (76例[10%]/722例)。新型冠状病毒肺炎患者的肝脏损伤可能是由于病毒感染肝脏细胞或其他原因, 如药物毒性和系统性炎症。<sup>4</sup>数据表明肝损伤在COVID-19重症患者中较轻症患者更为普遍。<sup>4</sup>然而, 其他慢性肝病如非酒精性脂肪肝、酒精相关性肝病和自身免疫性肝炎对新型冠状病毒肺炎预后的影响需要进一步评估。

如之前SARS疫情暴发所示, 肝移植可能涉及从供体到受体的病毒感染传播风险, 因此供体的筛选和检测至关重要。<sup>5</sup>尽管在报道COVID-19患者中许多患者有共病状态<sup>2</sup>, 但迄今为止没有一个是移植受者。移植临床医生可遵循移植学会发布的指南<sup>6</sup>, 以及当地卫生管理部门关于隔离、检疫、检测和监测从疫区返回的旅行者指南。

由于恶性肿瘤和肿瘤治疗所引起的免疫功能低下状态, 癌症患者一般更容易受感染。然而, 胃肠道肿瘤患者是否比健康人更容易感染SARS-

CoV-2仍不清楚。在最近中国癌症患者感染SARS-CoV-2的分析中<sup>7</sup>, 1590例COVID-19中有18例 (1%) 有肿瘤史, 其中3例结直肠癌病史 (结肠管状腺癌1例, 直肠癌1例, 结直肠癌1例)。目前数据显示合并肿瘤的COVID-19的患者预后更差。因此建议, 在患者个体化治疗基础上推迟辅助化疗或择期手术, 加强个人防护措施, 以及更严密的监控或治疗。<sup>7</sup>

生物制剂和免疫抑制剂的使用, 是否使IBD患者更易感染SARS-CoV-2是普遍关注的问题。目前, 在包括中国最大的7个IBD转诊中心, 拥有

## 表1. COVID-19流行期间IBD患者管理的主要建议

### 高危人群

- 使用免疫抑制剂的IBD患者
- 营养不良的活动期IBD患者
- 老年IBD患者
- 反复就诊的IBD患者
- 患有高血压/糖尿病等基础疾病的IBD患者
- 妊娠IBD患者

### IBD患者的药物治疗

- 如果病情稳定, 继续目前的治疗; 如果病情加重, 请联系医生调整治疗药物
- 5-ASA可以继续使用, 不增加感染风险
- 激素可以继续使用, 但是要注意不良反应
- 疫区患者不建议新开始使用免疫抑制剂或增加剂量
- 生物制剂如抗TNF(英夫利昔单抗或阿达木单抗等)可继续使用
- 如果无法住院接受英夫利昔单抗输液, 可改为在家阿达木单抗皮下注射治疗
- 维妥珠单抗可以继续使用
- 乌司奴单抗可以继续使用, 但新开始使用乌司奴单抗需要到输液中心就诊, 因此不鼓励使用
- 如果无法获得生物制剂, 可使用肠内营养
- 除非没有其他可选择的药物, 否则不建议疫区患者新开始使用托法替尼

### 手术和内镜

- 推迟择期手术和内镜检查
- 急诊手术和内镜检查前, 筛查COVID-19 (血常规、IgM/IgG、核酸检测和胸部CT)

### IBD发热患者\*

- 如有发热请与您的IBD医生联系, 如果体温持续超过38度, 做好防护可到发热门诊就诊
- 如果不能排除COVID-19的可能, 与您的IBD医生联系是否暂停免疫抑制剂和生物制剂的使用, 遵循当地疫情指南就诊

发热是 COVID-19最常见的症状

超过20000名IBD患者的中国IBD精英联盟（IBD Elite Union）中，没有接到IBD患者感染了SARS-CoV-2的报告。<sup>8</sup>武汉市三个最大的转诊IBD中心（同济医院、协和医院、中南医院），截止到本文撰稿日期（2020年3月8日）也未报告IBD患者感染了SARS-CoV-2。

自爆发COVID-19以来，中国已实施多项策略以降低IBD患者感染SARS-CoV-2的潜在风险。首先，中华医学会消化病学分会炎症性肠病学组于2020年2月初正式发布了IBD患者管理指南。<sup>9</sup>该指南包括如免疫抑制剂和生物制剂的使用、饮食、推迟择期手术和内镜检查，以及个人防护等规定的实用建议，这些要点见表1。其次，中国炎症性肠病基金会（China Crohn's & Colitis Foundation, CCCF）自2020年1月29日起组织了一个IBD专家志愿者小组，为中国IBD患者提供在线咨询服务。第三，一些IBD中心已经启动了IBD患者远程视频义诊，门诊以及随访计划，提供IBD患者便捷有效的在线管理，通过避免与公共区域受感染的患者密切接触，降低SARS-CoV-2感染的潜在风险。随着全球IBD患者对COVID-19的关注，国际非营利组织如美国炎症性肠病基金会（Crohn's Colitis of Foundation America）和英国炎症性肠病基金会（Crohn's Colitis UK）提供了关于COVID-19的有用在线信息。<sup>10,11</sup>这些指导和建议应立即提供给全球医务工作者和IBD患者。

COVID-19患者合并的消化系统疾病谱及其对COVID-19治疗和预后的影响仍不清楚。需要进一步分析中国卫健委建立的COVID-19队列中的数据，这将有助于更准确地确定IBD等消化道疾病患者感染SARS-CoV-2的风险。诊治患有合并症患者的中国数据和中国经验将为全球范围COVID-19患者治疗提供重要参考价值。

无利益冲突。感谢中华医学会消化病学分会炎症性肠病学组，中国炎症性肠病精英联盟，中国炎症性肠病质量评估中心委员会成员的支持。毛仁和梁洁贡献均等。

毛仁<sup>1\*</sup>，梁洁<sup>2\*</sup>，沈骏<sup>3</sup>，Subrata Ghosh<sup>4</sup>，朱良如<sup>5</sup>，杨红<sup>6</sup>，吴开春<sup>2</sup>，陈昱湖<sup>1</sup>

中华医学会消化病学分会炎症性肠病学组，中国炎症性肠病精英联盟，中国炎症性肠病质量评估中心委员会. chenminhu@mail.sysu.edu.cn

<sup>1</sup>中山大学附属第一医院消化内科，中山二路58号，广州，510080，中国 <sup>2</sup>空军军医大学西京消化病医院肿瘤生物学国家重点实验室，国家消化疾病临床研究中心，西安，710032，中国 <sup>3</sup>上海交通大学医学院附属仁济医院消化内科，上海市消化疾病研究所，上海市炎症性肠病研究中心，浦建路160号，上海，200127，中国 <sup>4</sup>NIHR生物医学研究所，转化医学研究所，伯明翰大学和伯明翰大学医院，NHS信托基金会，英国 <sup>5</sup>武汉华中科技大学同济医学院协和医院消化科，武汉，中国 <sup>6</sup>北京协和医院消化科，中国医学科学院，北京协和医学院，北京，中国

- Holshue ML, DeBolt C, Lindquist S, et al. First case of 2019 novel coronavirus in the United States. *N Engl J Med* 2020; published online March 5. DOI:10.1056/NEJMoa2001191.
- Guan W, Ni Z, Hu Y, et al. Clinical characteristics of coronavirus disease 2019 in China. *N Engl J Med* 2020; published online Feb 28. DOI:10.1056/NEJMoa2002032.
- Liu Q, Wang R, Qu G et al. Macroscopic autopsy findings in a patient with COVID-19. *J Forensic Med* 2020; **36**: 1-3 (in Chinese).
- Zhang C, Shi L, Wang FS. Liver injury in COVID-19: management and challenges. *Lancet Gastroenterol Hepatol* 2020; published online March 4. [https://doi.org/10.1016/S2468-1253\(20\)30057-1](https://doi.org/10.1016/S2468-1253(20)30057-1).
- Kumar D, Tellier R, Draker R, Levy G, Humar A. Severe Acute Respiratory Syndrome (SARS) in a liver transplant recipient and guidelines for donor SARS screening. *Am J Transplant* 2003; **3**: 977-81.
- The Transplantation Society. Guidance on coronavirus disease 2019 (COVID-19) for transplant clinicians. <https://tts.org/23-tid/tid-news/657-tid-update-and-guidance-on-2019-novel-coronavirus-2019-ncov-for-transplant-id-clinicians> (accessed March 3, 2020).
- Liang W, Guan W, Chen R, et al. Cancer patients in SARS-CoV-2 infection: a nationwide analysis in China. *Lancet Oncol* 2020; published online Feb 14. DOI:10.1016/S1470-2045(20)30096-6.
- Mao R, Chen MH. Networked Clinical study collaboration on inflammatory bowel disease in China. *Am J Gastroenterol* 2018; **113**: 1266.
- Chinese Society of IBD. Managing IBD patients during the outbreak of COVID-19. *Chin J Dig* 2020; **40**: E001.
- Crohn's Colitis Foundation. What IBD patients should know about the 2019 novel coronavirus (COVID-19). <https://www.crohnscolitisfoundation.org/what-ibd-patients-should-know-about-2019-novel-coronavirus-covid-19> (accessed March 3, 2020).
- Crohn's & Colitis UK. Novel coronavirus (COVID-19) advice. <https://www.crohnsandcolitis.org.uk/news/updated-wuhan-novel-coronavirus-advice> (accessed March 3, 2020).
